# Supplementary material for: Risk-adapted treatment reduced chemotherapy exposure for clinical stage 1 pediatric testicular cancer
Source: Research Square preprint supplement (doi:10.21203/rs.3.rs-22756/v5), 2020-12-17

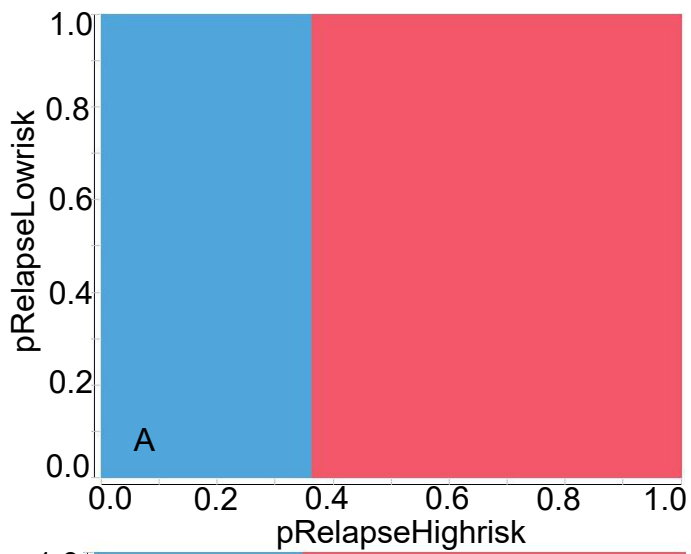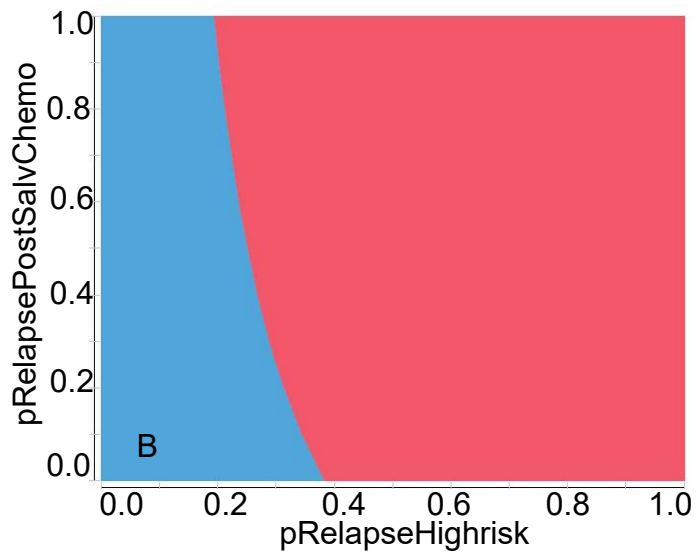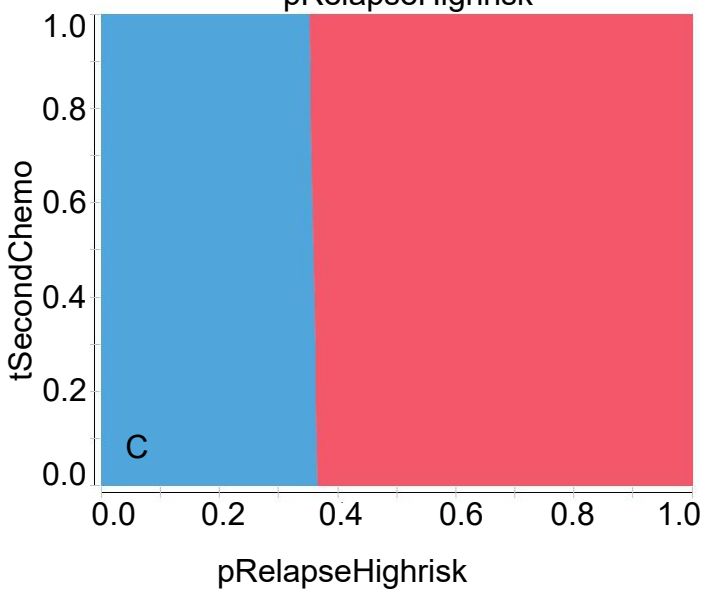

Supplement: Supplementary file [file 74f65a64bbbd5501d4575426.pdf]
